# Supplementary material for: Timely Schwann cell division drives peripheral myelination in vivo via the laminin/cAMP pathway
Source: Oxford University Press journal article supplement (doi:10.1242/dev.200640), 2022-08-08
Supplement: dev200640supp.pdf [file dev200640supp.pdf]

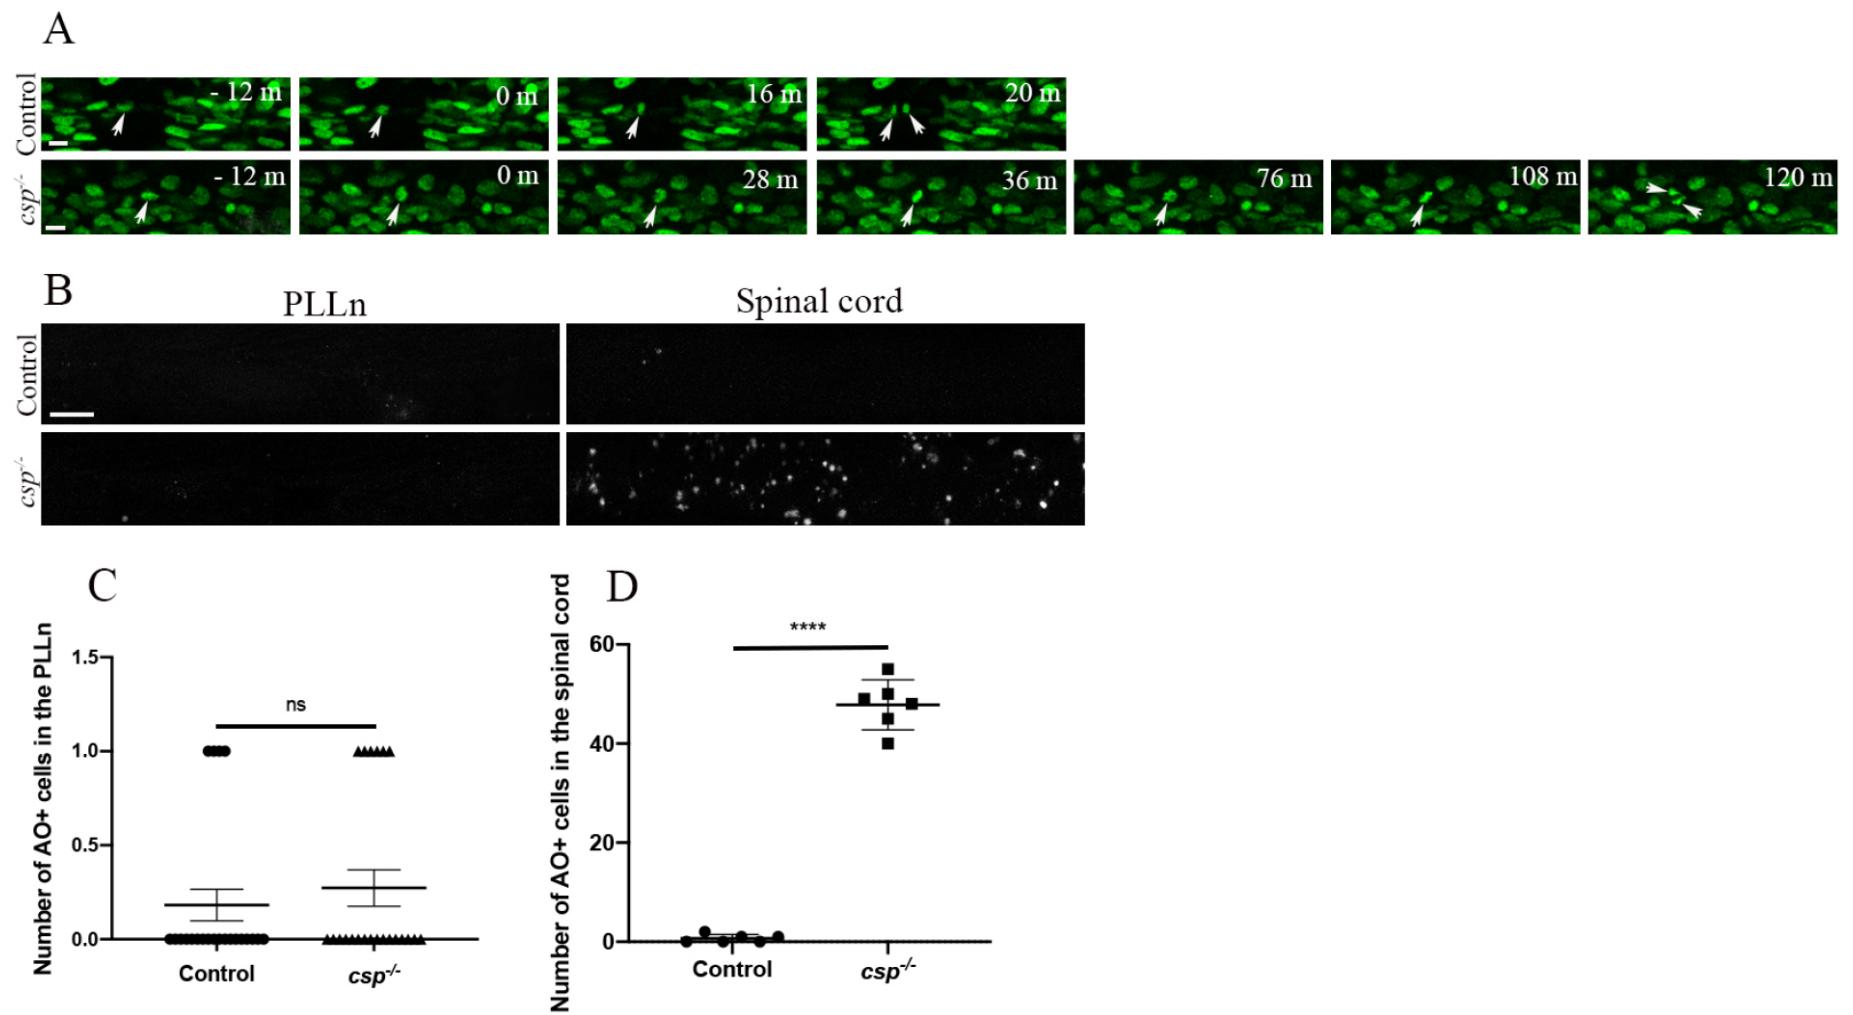

**Fig. S1. SC in *csp*<sup>-/-</sup> show delays in mitotic progression but exit mitosis with no significant increase in apoptosis**

(A) Still images of time-lapse imaging in control (average of  $16.67 \pm 1.22$  min, 6 nuclei,  $n=3$  embryos) and *csp*<sup>-/-</sup> (average of  $98.67 \pm 4.55$  min, 6 nuclei,  $n=3$  embryos) embryos injected with *h2b:gfp* (\*\*\*\*,  $p < 0.0001$ ). Arrows indicate SC nuclei from the beginning of M phase (time 0) when mitotic rounding takes place until the two nuclei split. Scale bars = 10  $\mu$ m. m, minutes.

(B) Acridine orange (AO) staining at 50 hpf in control and *csp*<sup>-/-</sup> embryos within a defined region of the PLLn and spinal cord. Scale bar = 25  $\mu$ m.

(C) Quantification of the number of AO positive cells in control (average of  $0.18 \pm 0.08$ ,  $n=11$  embryos) and *csp*<sup>-/-</sup> (average of  $0.27 \pm 0.09$ ,  $n=11$  embryos) within a defined region of the PLLn (ns,  $p=0.72$ ).

(D) Quantification of the number of AO positive cells in control (average of  $0.66 \pm 0.33$ ,  $n=6$  embryos) and *csp*<sup>-/-</sup> (average of  $47.83 \pm 2.05$ ,  $n=6$  embryos) within a defined region of the spinal cord (\*\*\*\*,  $p \leq 0.0001$ ).

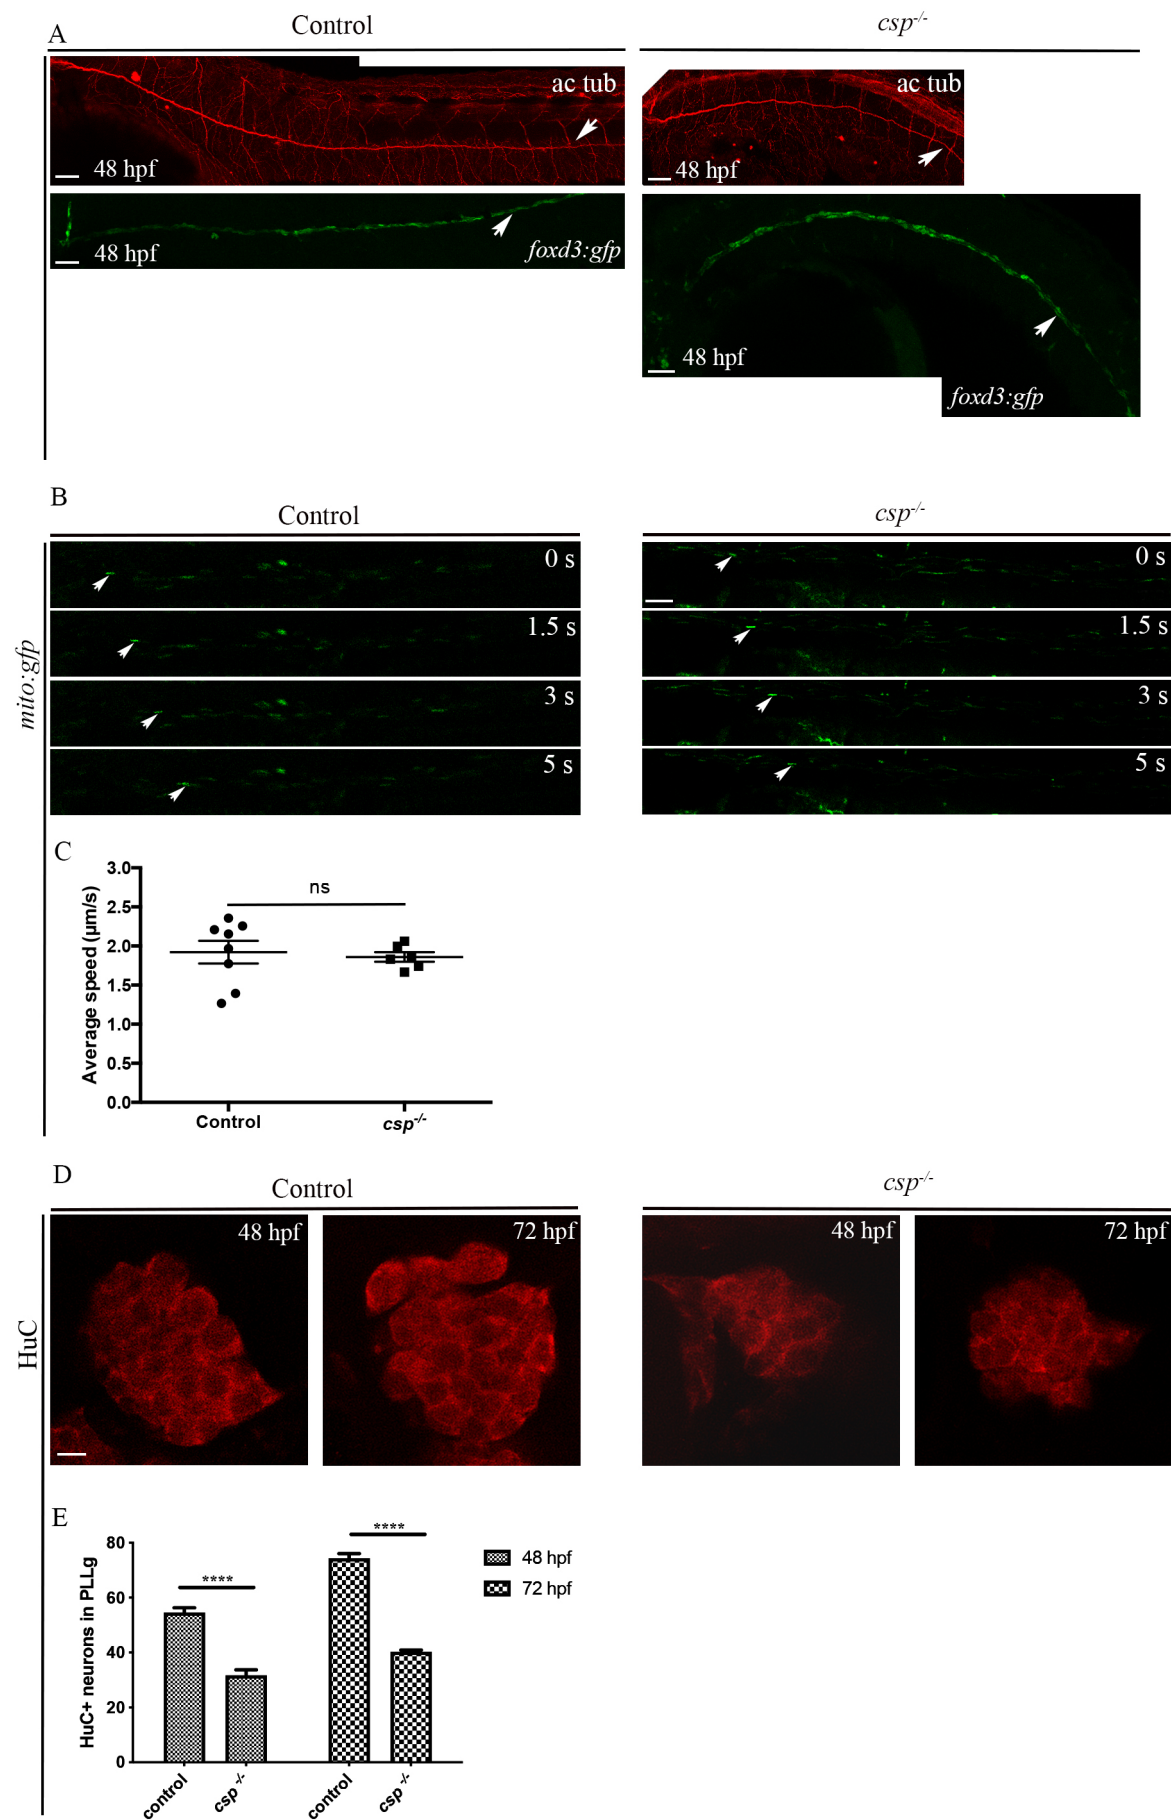

**Fig. S2. Sil is not required for axonal growth nor for mitochondrial axonal transport along the PLLn but regulates the number of neurons within the PLLg**

(A) Acetylated tubulin expression in a control embryo (n=12) and *csp*<sup>-/-</sup>-embryo (n=13) at 48 hpf showing the PLLn nerve (arrows). Lateral views of a control (n=16) and *csp*<sup>-/-</sup>-embryo (n=11) at 48 hpf showing PLLn GFP-expressing SC (arrows). Scale bars = 50 µm.

(B) Still images from time-lapse imaging in control and *csp*<sup>-/-</sup> embryos injected with *mito:gfp*. Arrows point to the same mitochondria followed through time in control and *csp*<sup>-/-</sup>. Scale bar = 5 µm. s, seconds.

(C) Quantification of the average speed of mitochondria along the PLLn at 50 hpf in controls (302 mitochondria, n = 8 embryos) and *csp*<sup>-/-</sup>-embryos (93 mitochondria, n = 6 embryos) (ns, p=0.6976).

(D) HuC immunolabeling of the PLLg at 48 and 72 hpf in control and *csp*<sup>-/-</sup> embryos. Scale bar = µm.

(E) Quantification of the number of neurons in the PLLg at 48 hpf in control (average of 54.58±5.99 neurons, n = 12) and *csp*<sup>-/-</sup> (average of 31.71±5.31 neurons, n = 7) embryos and at 72 hpf in control (average of 74.33±5.88 neurons, n = 12) and *csp*<sup>-/-</sup> (40.29± 1.60 neurons n = 7) embryos (\*\*\*\*, p≤ 0.0001 ; \*\*\*\*, p≤ 0.0001).

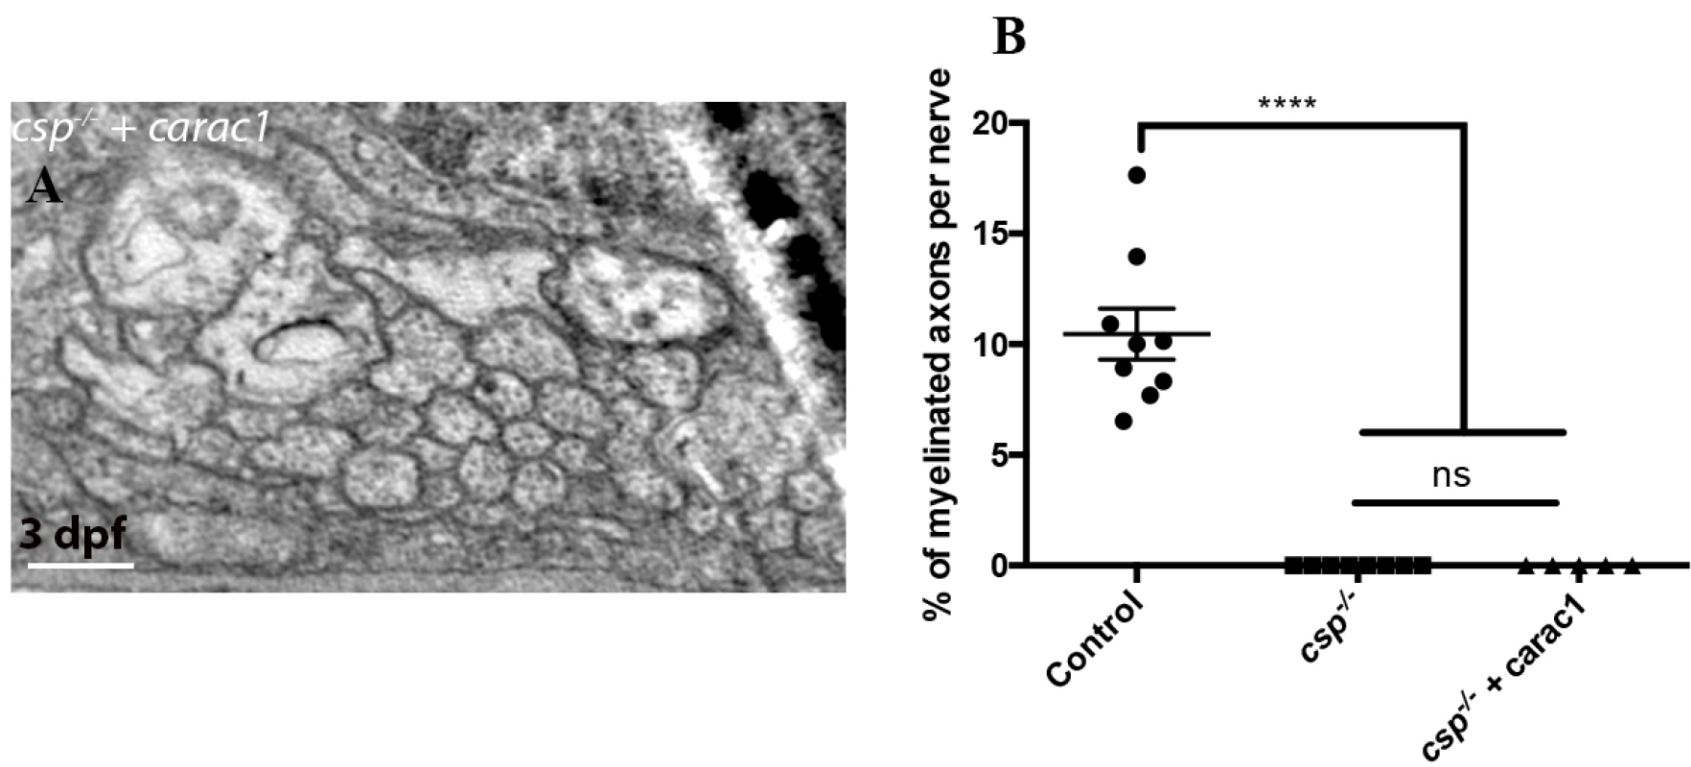

**Fig. S3. Forcing Rael activity does not rescue radial sorting and myelination defects in *csp<sup>-/-</sup>***

(A) TEM of a cross section of the PLLn at 3 dpf in *csp<sup>-/-</sup>* embryo injected with a constitutive active form of Rael (*carac1*).

Scale bar 0.5  $\mu$ m.

(B) Quantification of the percentage of myelinated axons relative to the total number of axons per nerve at 3 dpf in controls (average of  $10.5 \pm 1.13$ ), *csp<sup>-/-</sup>* (average of 0) and *csp<sup>-/-</sup>* injected with *carac1* (average of 0) (\*\*\*\*,  $p \leq 0.0001$ , ns,  $p \geq 0.999$ ).

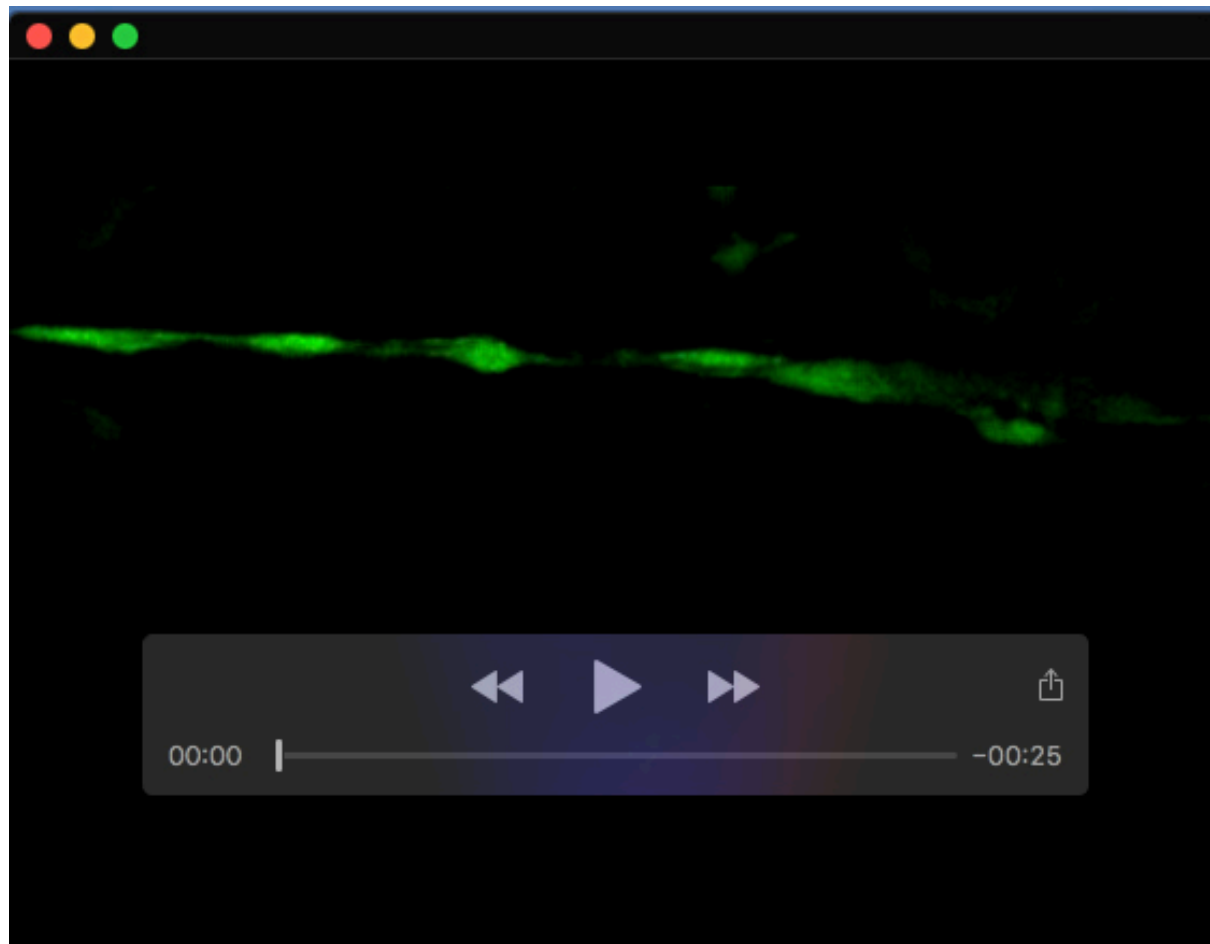

**Movie 1. Real-time imaging of SC in *Tg(foxd3:gfp)* embryo at 28 hpf**

A 28 hpf embryo expressing GFP in SC; the control embryo was imaged every 4 minutes for several hours by confocal microscopy. Lateral view; anterior to the left and dorsal to the top. This video represents two hours of continuous real-time imaging.

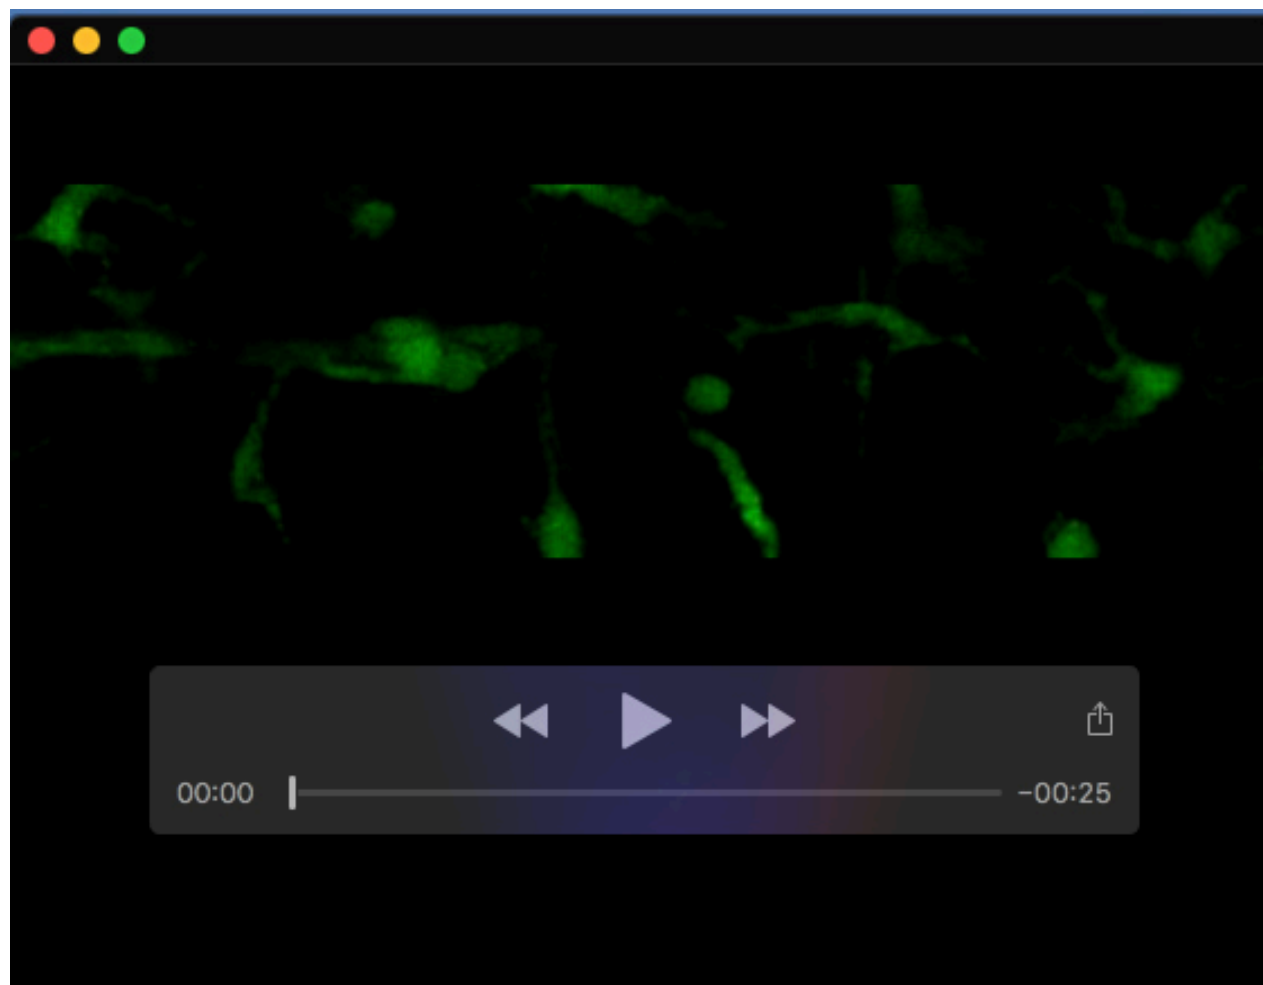

**Movie 2. Real-time imaging of SC in *Tg(foxd3:gfp)/csp<sup>-/-</sup>* embryo at 28 hpf.**

A 28 hpf embryo expressing GFP in SC; the *csp<sup>-/-</sup>* embryo was imaged every 4 minutes for several hours by confocal microscopy. Lateral view; anterior to the left and dorsal to the top. This video represents four hours of continuous real-time imaging.

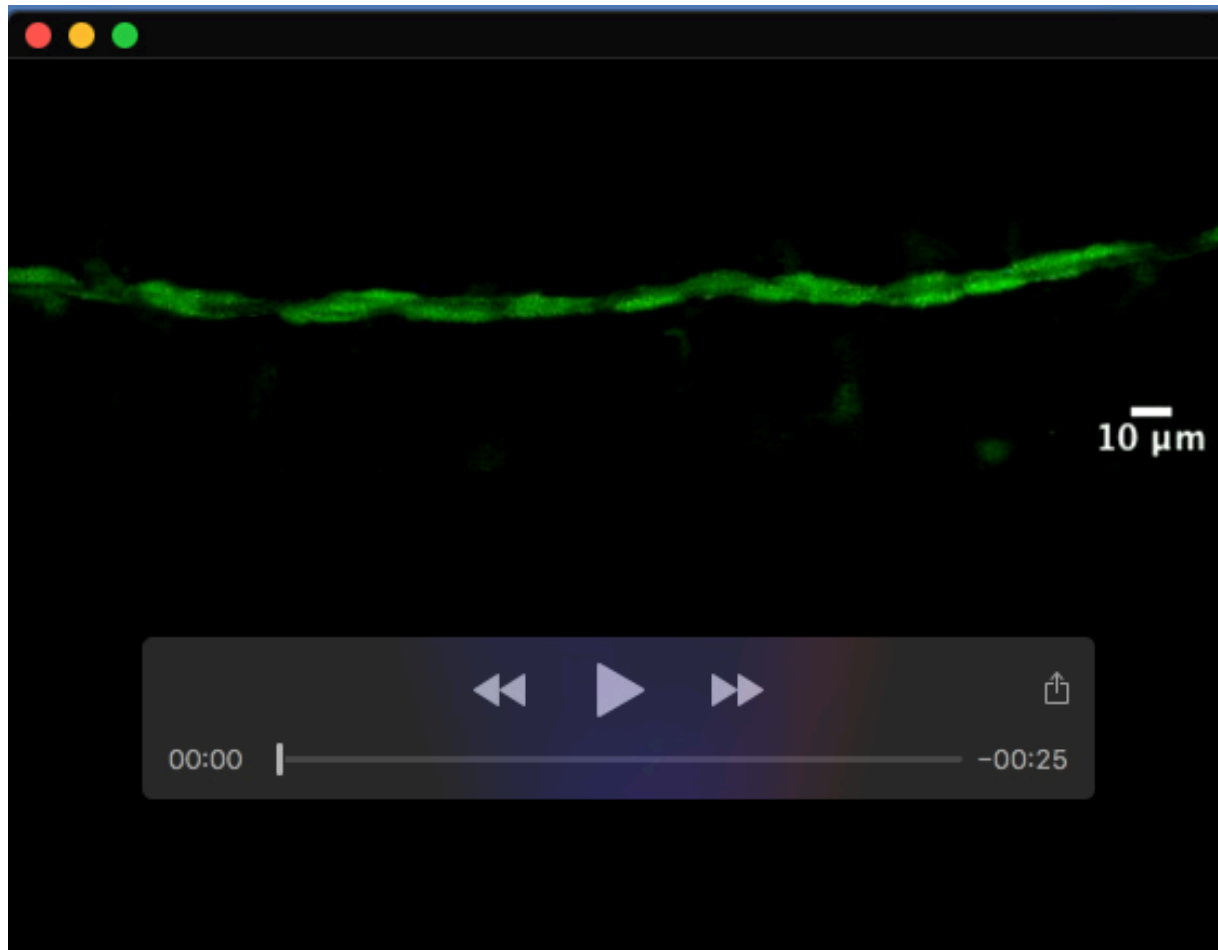

**Movie 3. Real-time imaging of SC in *Tg(foxd3:gfp)* embryo at 48 hpf.**

A 48 hpf embryo expressing GFP in SC; the control embryo was imaged every 4 minutes for several hours by confocal microscopy. Lateral view; anterior to the left and dorsal to the top. This video represents four and a half hours of continuous real-time imaging.

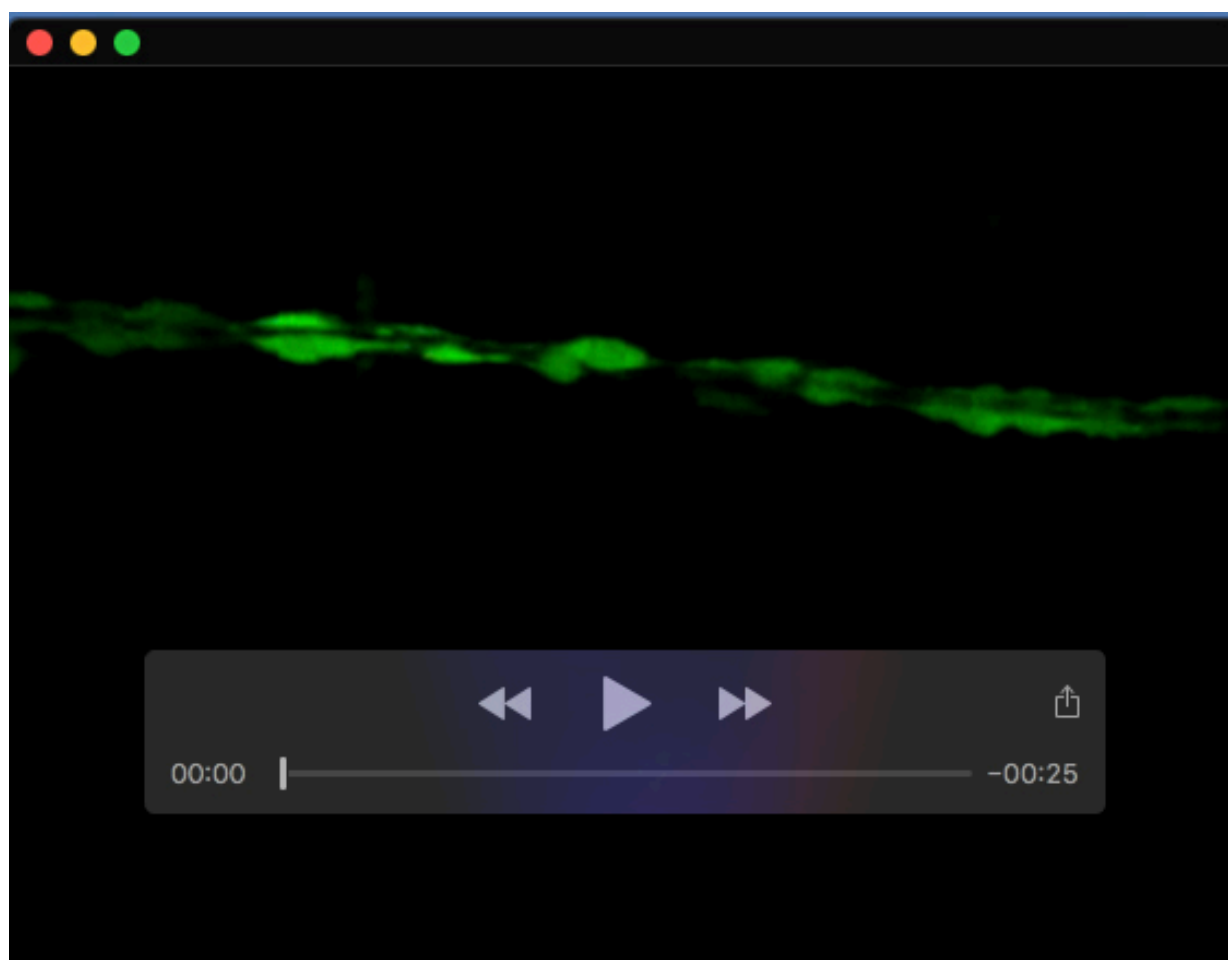

**Movie 4. Real-time imaging of SC in *Tg(foxd3:gfp)/csp<sup>-/-</sup>* embryo at 48 hpf.**

A 48 hpf embryo expressing GFP in SC; the *csp<sup>-/-</sup>* embryo was imaged every 4 minutes for several hours by confocal microscopy. Lateral view; anterior to the left and dorsal to the top. This video represents four and a half hours of continuous real-time imaging.

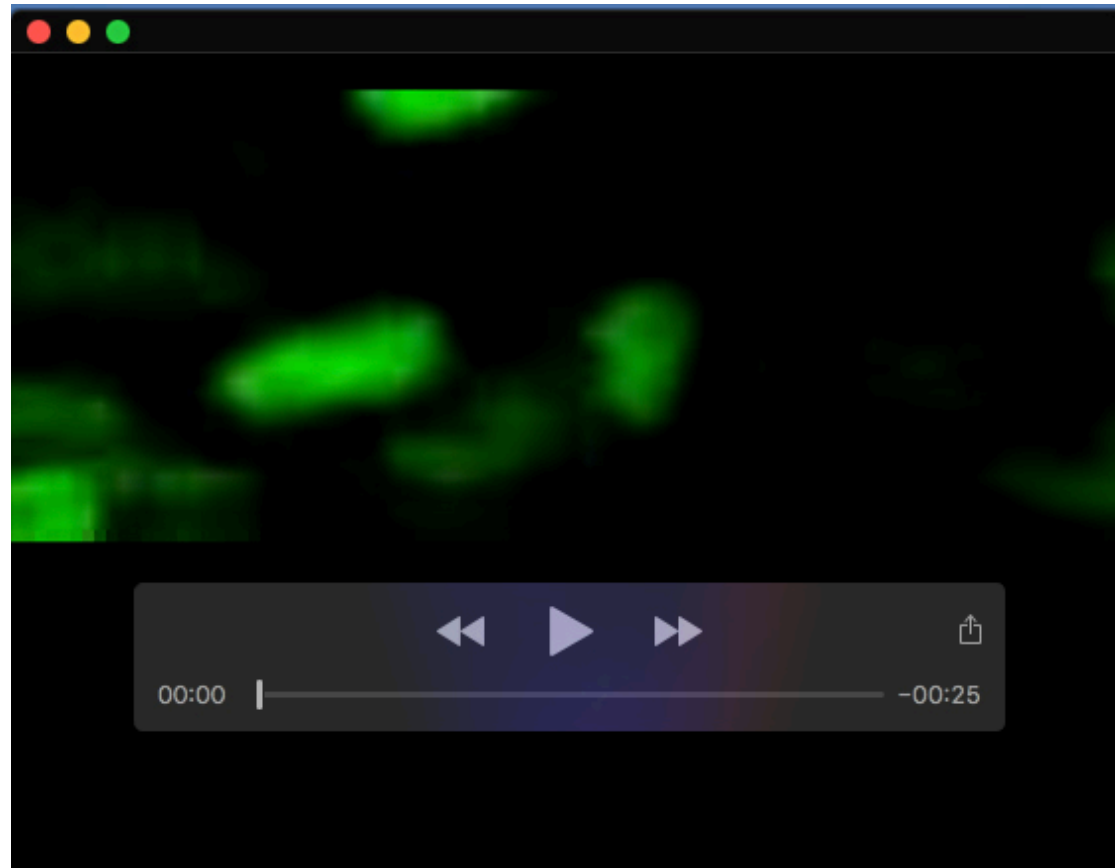

**Movie 5. Real-time imaging of SC nuclei in control at 48 hpf.**

A 48 hpf control embryo expressing GFP in SC nuclei after *h2b-gfp* mRNA injection; the embryo was imaged every 4 minutes for several hours by confocal microscopy. Lateral view; anterior to the left and dorsal to the top. This video represents 40 minutes of continuous real-time imaging.

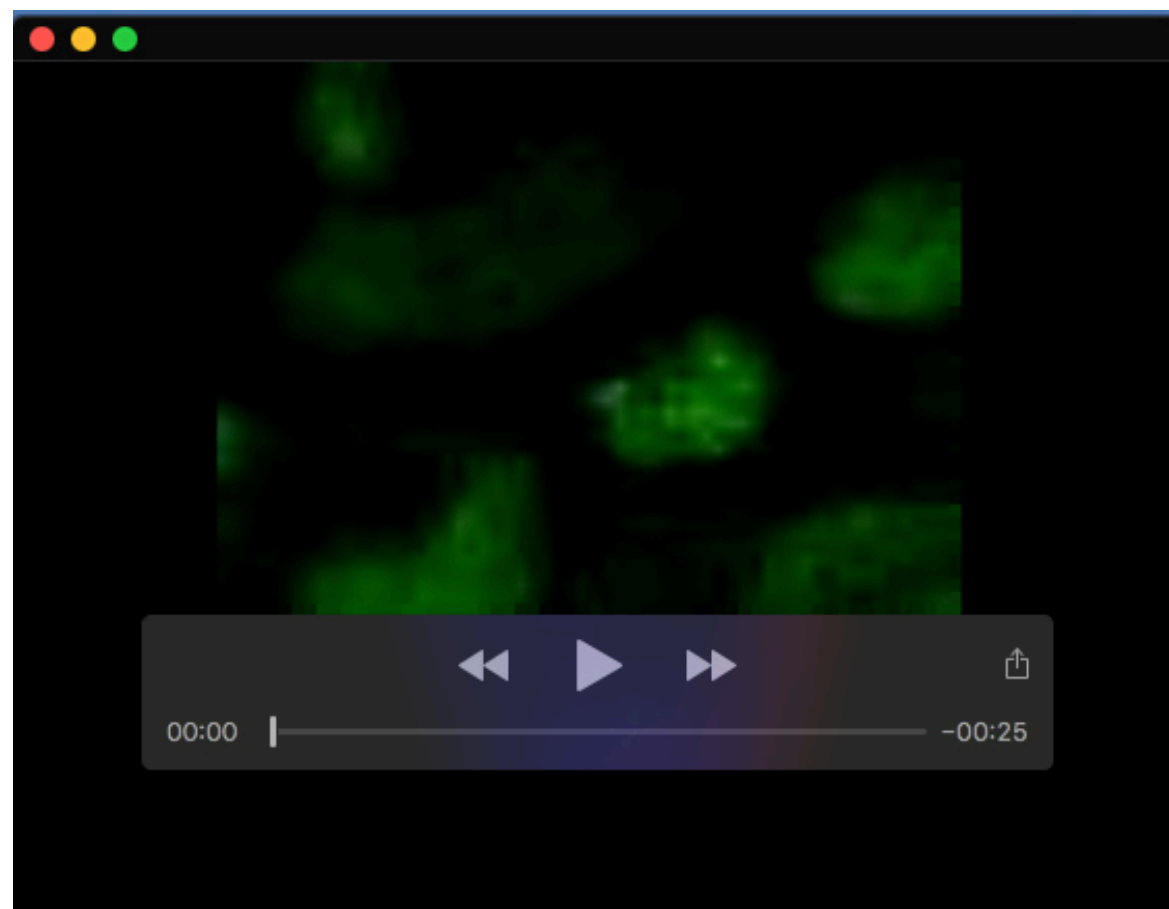

**Movie 6. Real-time imaging of SC nuclei in *csp*<sup>-/-</sup> at 48 hpf.**

A 48 hpf *csp*<sup>-/-</sup> embryo expressing GFP in SC nuclei after *h2b-gfp* mRNA injection; the embryo was imaged every 4 minutes for several hours by confocal microscopy. Lateral view; anterior to the left and dorsal to the top. This video represents 100 minutes of continuous real-time imaging.



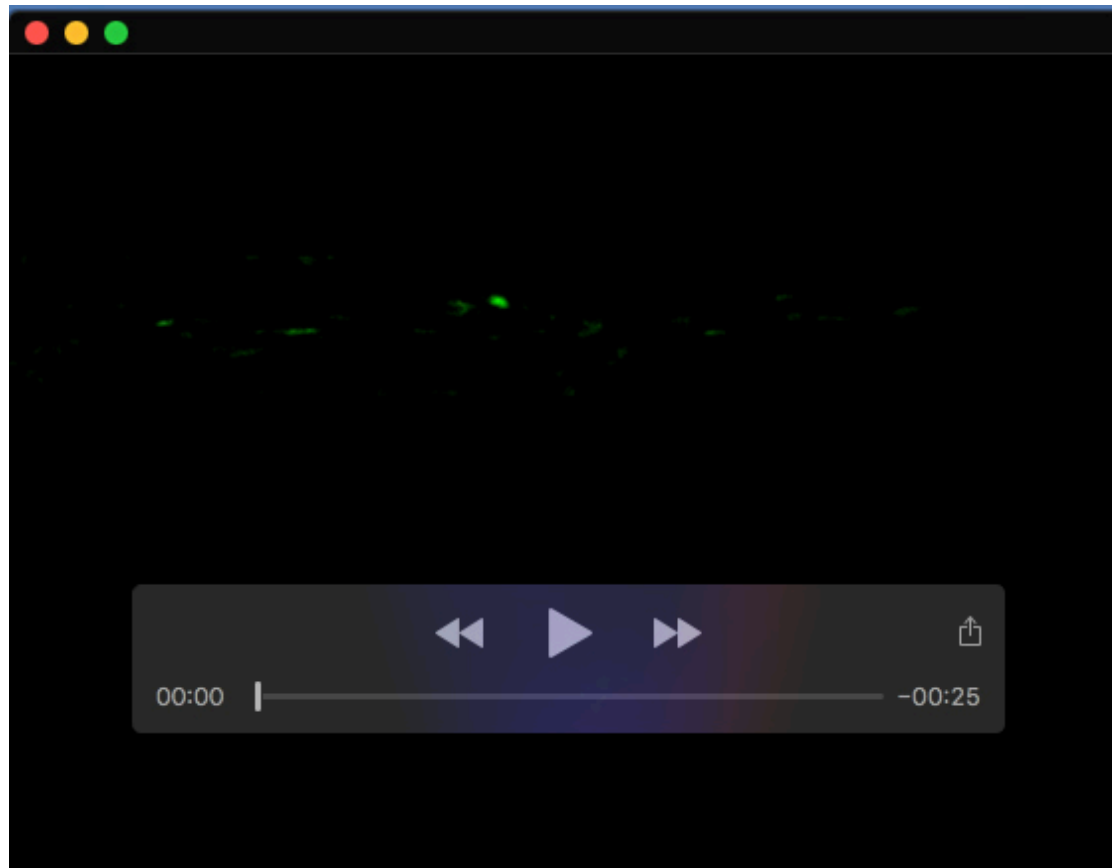

**Movie 7. Real-time imaging of mitochondria in a control PLLn at 48 hpf.**

A 48 hpf control embryo expressing GFP in mitochondria after *mito-gfp* mRNA injection; the embryo was imaged every 120 milliseconds for several minutes by confocal microscopy. Lateral view; anterior to the left and dorsal to the top. This video represents 18 seconds of real-time continuous imaging. White arrow highlights an anterograde moving mitochondria while yellow arrow highlights a retrograde moving mitochondria.

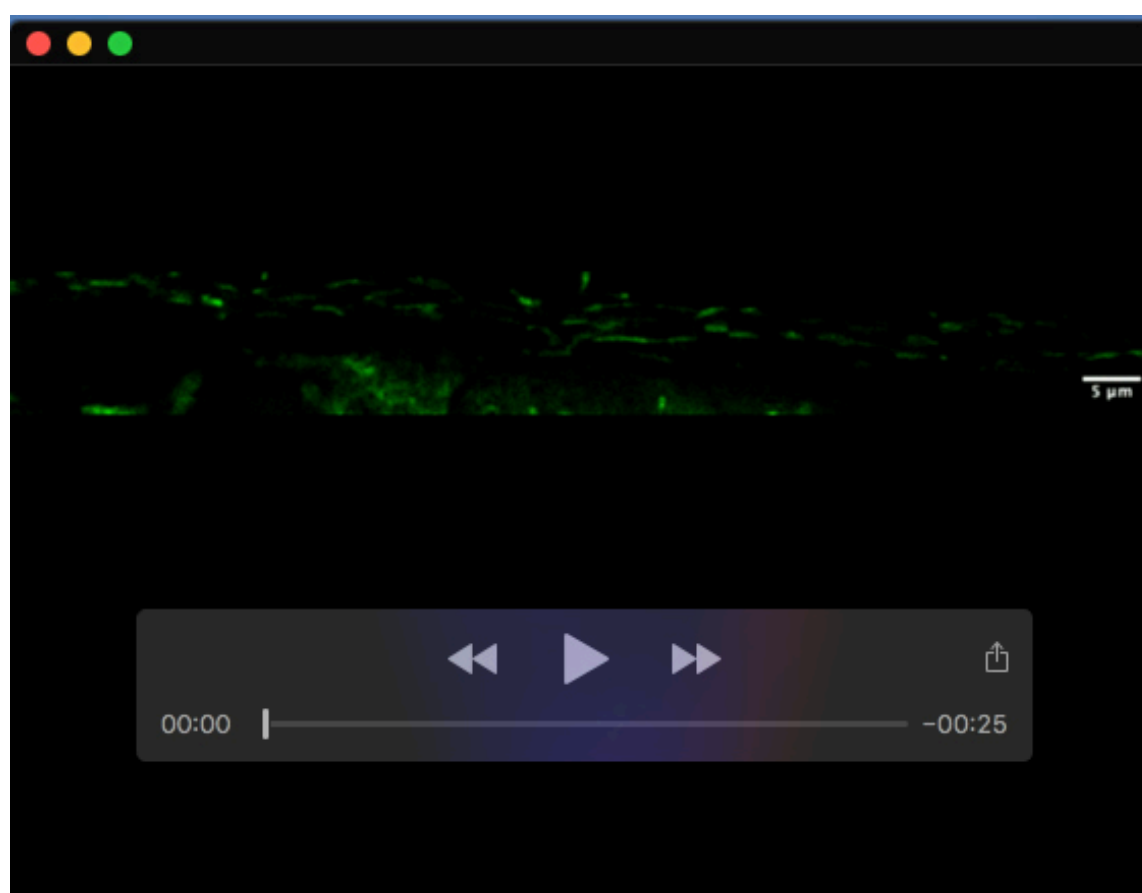

**Movie 8. Real-time imaging of mitochondria in a *csp*<sup>-/-</sup> PLLn at 48 hpf.**

A 48 hpf *csp*<sup>-/-</sup> embryo expressing GFP in mitochondria after *mito-gfp* mRNA injection; the embryo was imaged every 120 milliseconds for several minutes by confocal microscopy. Lateral view; anterior to the left and dorsal to the top. This video represents 36 seconds of continuous real-time imaging. White arrow highlights an anterograde moving mitochondria while yellow arrow highlights a retrograde moving mitochondria.
